# Supplementary material
Source: Research Square preprint supplement (doi:10.21203/rs.3.rs-9405620/v1)
Supplement: Supplementary file 1 [file 0df9419ecea791f638f83ad9.docx]

**APPENDIX A.1. Study context**

The four countries analyzed in this study — Ethiopia, India, Peru, and Vietnam — represent diverse climate risk profiles and socioeconomic contexts, yet they share a common structural condition: rural livelihoods that are highly sensitive to environmental variability and populations with limited capacity to absorb repeated shocks. This diversity makes the cross-national comparison analytically valuable, as it allows us to assess whether the mechanisms linking cumulative climate stress to migration operate across radically different institutional, agricultural, and demographic settings.

Vietnam is characterized by acute exposure to rapid-onset hydrometeorological events. The country ranks consistently among the most climate-affected globally, driven by the high frequency of typhoons and catastrophic flooding in the Mekong River Delta and coastal regions (Adil et al., 2025). Environmental stressors including saltwater intrusion and riverbank erosion have made migration a central household strategy in delta communities, where remittance flows from urban corridors — particularly Ho Chi Minh City — sustain rural resilience (Entzinger & Scholten, 2022). Empirical evidence from Vietnam suggests that the type of shock matters for migration outcomes: droughts tend to induce temporary moves, while flood events are more likely to precipitate permanent relocation (Berlemann & Tran, 2020). These findings are consistent with our expectation that cumulative exposure — which in Vietnam's case may reflect repeated flood-drought cycles — exerts a stronger and more durable influence on mobility than any single acute event.

India's climate vulnerability is marked by the scale of its agricultural exposure to monsoon variability and extreme heat events (Adil et al., 2025). Research in states such as Bihar and Andhra Pradesh — the latter one of the Young Lives study sites — documents that declines in agricultural yields associated with climate shocks increase out-migration rates among smallholder and land-poor households (Viswanathan & Kumar, 2015). Migration in rural India frequently operates as a distress adaptation, in which repeated exposure to agricultural failure pushes households into seasonal or permanent labor migration as a coping strategy of last resort (Jha et al., 2018; Richa et al., 2024). This pattern aligns directly with our cumulative vulnerability framework: it is not the isolated shock but the progressive exhaustion of on-farm coping options that ultimately triggers mobility.

Taken together, the inclusion of India and Vietnam situates the analysis within a broader Asian context characterized by recurrent climatic stress, high population density in vulnerable rural areas, and active but constrained internal migration systems. These features are analytically relevant for the mechanisms studied here, including repeated exposure to environmental shocks is more frequent. Yet, the capacity to respond through migration remains unevenly distributed. As a result, the dynamics of cumulative vulnerability and mobility traps identified in this paper are likely to be particularly salient in such settings, where households face both sustained environmental pressure and structural constraints on mobility.

Peru exhibits the highest levels of community migration in the Young Lives sample, a pattern consistent with its exposure to the El Niño-Southern Oscillation (ENSO), which produces alternating floods in coastal regions and severe droughts in the Andean highlands (Adil et al., 2025). The country's geographic and ecological diversity — spanning coastal desert, Andean highlands, and Amazonian lowlands — generates distinct migration corridors tied to specific environmental risk profiles. Research on Andean communities documents the emergence of what Wrathall et al. (2014) call "climate rigidity traps," in which the most resource-constrained households lack the means to migrate despite severe environmental deterioration, becoming effectively immobilized in degrading environments (Milan & Ho, 2014). This literature anticipates our heterogeneity findings for Peru and provides important contextual grounding for the particularly strong cumulative shock effects observed in that country.

Ethiopia faces the most frequent environmental shocks in the study, primarily through recurrent droughts that directly threaten food security and agricultural livelihoods across a large share of the rural population (Leal Filho et al., 2023). Migration responses to drought in Ethiopia are strongly gendered: men's labor migration tends to increase during drought episodes, while marriage-related moves among women often decrease, reflecting the gendered organization of household adaptation strategies (Gray & Mueller, 2012). In the northern highlands, high population density combined with progressive land degradation and rainfall variability has created conditions of acute socio-ecological pressure in which mobility functions as a primary survival mechanism for affected households (Hermans-Neumann et al., 2017). Ethiopia's relatively low wealth index in the Young Lives sample — the lowest of the four countries — also provides important context for interpreting the heterogeneity results: the concentration of households at the lower end of the wealth distribution may explain why cumulative shock effects in Ethiopia, while significant, are somewhat smaller in magnitude than those observed in Peru or Vietnam.

Taken together, the four countries offer a combination of climatic diversity and structural similarity that is analytically productive. Each faces distinct hazard profiles and operates within different institutional frameworks for migration and social protection, yet all are characterized by rural livelihoods dependent on climate-sensitive agriculture, limited state capacity to buffer environmental shocks, and active migration systems through which households manage risk. This combination provides the necessary variation to identify general mechanisms while retaining enough contextual specificity to interpret cross-national differences in effect magnitude.

**Table A.1. Climate risk profiles and migration context by country**

| ***Country*** | **Long-term CRI Rank (1995-2024)** | **Primary Climate Drivers (CRI 2026)** | **Primary climate hazards** | **Key migration pattern** | **Relevant literature** |
| --- | --- | --- | --- | --- | --- |
| *Vietnam* | **High**  (Top 10) | Recurrent typhoons, deltaic flooding, and saltwater intrusion. | Typhoons, deltaic flooding, saltwater intrusion | Permanent (floods) / temporary (droughts) | Berlemann & Tran, 2020; Entzinger & Scholten, 2022 |
| *India* | **Very High** | Monsoon variability, extreme heatwaves, and agricultural yield shocks. | Monsoon variability, extreme heat | Seasonal labor and distress migration | Viswanathan & Kumar, 2015; Jha et al., 2018 |
| *Peru* | **High** | El Niño Southern Oscillation (ENSO), floods, and Andean glacial retreat. | ENSO (floods/droughts), glacial retreat | High general mobility; rigidity traps | Wrathall et al., 2014; Milan & Ho, 2014 |
| *Ethiopia* | **High** (Critical) | Persistent droughts, land degradation, and rainfall unpredictability. | Recurrent drought, land degradation | Short-distance survival migration | Gray & Mueller, 2012; Hermans-Neumann et al., 2017 |

**Note: Climate risk rankings from Adil et al. (2025). Migration patterns from country-specific literature cited in the final column.**

**APPENDIX 2. Validation of subjective shock reports**

To assess whether visually identified peaks correspond to objective climatic conditions, Table A1 aligns the timing of reported shocks in Figures A1–A2 with independent meteorological and disaster indicators. The correspondence is close: the increase in drought exposure in Ethiopia between 2006 and 2009 coincides with documented rainfall deficits and food insecurity during the Horn of Africa drought; the peak in Peru around 2009–2010 aligns with El Niño conditions captured by the Oceanic Niño Index; and the rise in flood-related shocks in Vietnam during the late 2000s corresponds to an active typhoon period recorded in global cyclone databases. Regional peaks in India, particularly in Telangana, coincide with the 2009 monsoon failure and the 2015–2016 El Niño event.

Figure A1 shows clear temporal variation in reported environmental shocks across Ethiopia, Peru, and Vietnam, with distinct patterns reflecting country-specific climatic regimes.

**Figure A.1. Reported environment shocks over time in selected Young Lives countries**

In Ethiopia, shocks are overwhelmingly dominated by drought and increase sharply between 2006 and 2009, rising from near zero to almost 40% of households reporting at least one event. This period coincides with the well-documented Horn of Africa drought (2008–2011), and the magnitude and persistence of the increase suggest a multi-year deterioration of environmental conditions rather than a single isolated shock. In Peru, overall shock incidence remains comparatively low, but displays a distinct peak around 2009–2010, reaching approximately 15% for any shock and driven primarily by flooding. This timing aligns closely with El Niño-related hydrometeorological disruptions, indicating that shocks in Peru are episodic and concentrated around large-scale climatic anomalies. Vietnam exhibits a similar temporal concentration, with reported shocks increasing steadily between 2006 and 2009, peaking at close to 20%. Unlike Ethiopia, however, this pattern is driven mainly by flood exposure, consistent with repeated typhoon activity and heavy rainfall events affecting the country during this period. The subsequent sharp decline suggests that these shocks are clustered in time rather than persistent.

Figure A2 reveals substantial regional heterogeneity in environmental shock exposure within India, both in magnitude and temporal pattern. Rayalaseema exhibits the highest and most persistent levels of drought exposure, with a pronounced spike around 2006 reaching nearly 50% of households reporting a shock, followed by consistently elevated levels thereafter. This pattern is consistent with the prolonged dry conditions affecting the semi-arid interior of Andhra Pradesh during the mid-2000s and reflects structurally higher vulnerability to rainfall deficits in this region.

**Figure A.2. Reported environment shocks over time in Young Lives India States**

Telangana displays a more episodic and volatile pattern, with a sharp increase in 2006 and a second peak in 2015–2016, corresponding to periods of monsoon variability and the strong El Niño event. In contrast to Rayalaseema, shocks in Telangana appear more temporally concentrated, suggesting exposure to irregular but recurrent climatic disturbances rather than sustained drought conditions.

Coastal Andhra shows substantially lower levels of drought exposure throughout the period, with peaks remaining below 15% and a more moderate temporal profile. This is consistent with its more irrigated agricultural systems and relatively stable coastal climate, although some increases coincide with periods of regional rainfall variability.

Importantly, the timing of peaks across regions aligns with major climatic events in India, including the mid-2000s drought episodes, the 2009 monsoon failure, and the 2015–2016 El Niño. At the same time, the absence of synchronized patterns across regions indicates that reported shocks capture localized environmental conditions rather than aggregate reporting trends. Taken together, these results support the interpretation that the data reflect repeated exposure to region-specific climatic shocks, consistent with the cumulative exposure mechanism central to the analysis.

Taken together, the close correspondence between the timing of reported shocks and independent climatic indicators indicates that the survey-based measures capture meaningful environmental variation rather than reporting noise.

**Table A.2. Objective climate indicators corroborating reported shock patterns in Young Lives countries (2002–2016)**

| **Country / Region** | **Period** | **Reported shock (YL)** | **Objective indicator** | **Value / Severity** | **Source** |
| --- | --- | --- | --- | --- | --- |
| **Ethiopia** | 2005/06 y 2008–2011 | Drought spike (~40% HH) | TRMM 3B43 rainfall anomaly | Rainfall 30–75% below normal across Horn of Africa; central highlands and eastern Ethiopia most affected | Nicholson (2014), J. Arid Environments, <https://doi.org/10.1016/j.jaridenv.2013.12.003> |
| **Ethiopia** | 2008–2011 | Persistent drought | SPI gauge-based (14 zones) | 2009 second driest year nationally since 1971, after 1984; drought in all 14 zones simultaneously, unique in the record | Viste et al. (2013), Theor. Appl. Climatol., <https://doi.org/10.1007/s00704-012-0746-3> |
| **Ethiopia** | 2009 | Drought / food insecurity | FEWS NET Food Security Update | ~12.4 million people food insecure; belg/gu rains below normal; "highly and extremely food insecure" zones in Oromia, SNNPR, Somali, Afar | FEWS NET (2009), Ethiopia Food Security Update, May 2009. <https://fews.net/sites/default/files/documents/reports/ethiopia_05_2009_final.pdf> |
| **Peru** | 2009–2010 | Flood spike (~15% HH) | ONI (Oceanic Niño Index) | Moderate El Niño: ONI peak +1.56 (NDJ 2009) | NOAA CPC, ONI historical data: <https://www.cpc.ncep.noaa.gov/data/indices/oni.ascii.txt> |
| **Peru** | 2009–2010 | Flood spike | EM-DAT disaster database | Multiple flood events in coastal and Andean departments | CRED EM-DAT: <https://www.emdat.be> |
| **Vietnam** | 2006–2009 | Flood spike (~20% HH) | IBTrACS tropical cyclone database | Active typhoon period; major events include Xangsane (2006), Ketsana (2009), Mirinae (2009) — verifiable in IBTrACS records | Knapp et al. (2010), BAMS, <https://doi.org/10.1175/2009BAMS2755.1>; events via <https://ibtracs.unca.edu> |
| **India – Telangana** | 2009 | Drought/shock spike | IMD All-India Monsoon Rainfall | ~22% deficit below long-period average; second worst monsoon since 1979 | IMD Annual Report 2009 <https://metnet.imd.gov.in/docs/imdnews/ANNUAL_REPORT2009English.pdf> |
| **India – Telangana** | 2015–2016 | Second shock peak | ONI | Very strong El Niño: ONI peak +2.75 (NDJ 2015), strongest since 1997–98 | NOAA CPC ONI data <https://www.cpc.ncep.noaa.gov/products/analysis_monitoring/ensostuff/ONI_v5.php> |

**APPENDIX A.3. Validation of subjective drought measures using objective climate data**

This appendix assesses whether self-reported drought shocks are consistent with objective precipitation-based measures. We focus on droughts, as they provide the most direct mapping between subjective reports and climatic conditions, given their close link to local precipitation deficits.

The dependent variable is a binary indicator of reported drought exposure (shenv1), capturing whether the household experienced a drought during the inter-survey period. Objective drought conditions are approximated using standardized precipitation anomalies derived from gridded climate data. Specifically, we construct a short-run drought measure (prcp_min_2) defined as the minimum of precipitation z-scores over the current and previous period, capturing short-term precipitation deficits relative to local historical norms. Due to data availability, objective climate measures are only observed from Round 2 onwards in India and Peru, Round 3 in Ethiopia, and Round 4 in Vietnam. The analysis is therefore restricted to observations for which both subjective and objective measures are available. All models include individual fixed effects and year fixed effects, with standard errors clustered at the individual level. Year fixed effects are included to net out common macro-climatic shocks affecting all locations simultaneously. The coefficients can be interpreted as the change in the probability of reporting a drought shock associated with a one standard deviation decrease in precipitation.

Table A.3 presents results for India, Peru, and Ethiopia. In all three countries, lower precipitation is consistently and significantly associated with a higher probability of reporting drought shocks. The coefficients are negative and significant at the 1% level across all specifications, providing direct support for the validity of the subjective drought measure in these contexts.

**Table A.3. Objective validation of drought exposure**

|  | **India** | **Peru** | **Ethiopia** |
| --- | --- | --- | --- |
| Drought | -0.0460*** | -0.0331*** | -0.0445*** |
|  | (0.00516) | (0.00565) | (0.00935) |
| Observations | 10,330 | 8,365 | 10,319 |

Standard errors in parentheses. p < 0.10, ** p < 0.05, *** p < 0.01

Vietnam is excluded from Table A.2 due to the heterogeneous mapping between precipitation and drought conditions documented in Table A.2b. In monsoon-driven environments, deviations in total rainfall may reflect either drought or reduced flood risk depending on local hydrological conditions, making aggregate precipitation a poor proxy for experienced drought. Table A.3b examines this regional heterogeneity within Vietnam. The results reveal substantial variation across regions, both in magnitude and sign. In the Northern Uplands and Phu Yen, lower precipitation is associated with a higher probability of reporting drought shocks, consistent with expectations. In the Red River Delta, the relationship reverses: lower precipitation reduces rather than increases drought reporting, consistent with the interpretation that rainfall deficits in this region primarily reduce flood exposure rather than signal drought conditions. Other regions show weak or null relationships. Taken together, these patterns indicate that the failure of aggregate precipitation to predict drought reporting in Vietnam reflects genuine spatial heterogeneity in climatic risk rather than a failure of the validation strategy — and, by extension, support the interpretation that subjective shock reports in Vietnam capture locally meaningful environmental stress that aggregate precipitation measures cannot adequately summarize.

**Table A.3b. Objective validation of drought exposure in Vietnam by region**

|  | **Uplands** | **Red River** | **Phu Yen** | **Da Nang** | **Mekong** |
| --- | --- | --- | --- | --- | --- |
| Drought | -0.257*** | 0.367*** | -0.389*** | -0.000170 | -0.0166 |
|  | (0.0965) | (0.0633) | (0.0556) | (0.000383) | (0.116) |
| Observations | 2,096 | 2,132 | 2,154 | 1,893 | 2,102 |

Standard errors in parentheses. p < 0.10, ** p < 0.05, *** p < 0.01

This validation suggests that subjective measures capture meaningful short-run environmental variation, while the main analysis focuses on their cumulative effects.
